# Supplementary material for: Imaging Atherosclerosis
Source: PubMed Central journal article supplement (PMC4756468; doi:10.1161/circresaha.115.306247), 2016-02-19
Supplement: res-118-750-s003.pdf [file res-118-750-s003.pdf]

**Title:** Identification of Fibrous Cap Rupture With Magnetic Resonance Imaging Is Highly Associated With Recent Transient Ischemic Attack or Stroke

**Author:** Chun Yuan, Shao-xiong Zhang, Nayak L. Polissar, Denise Echelard, Geraldo Ortiz, Joseph W. Davis, Elizabeth Ellington, Marina S. Ferguson, Thomas S. Hatsukami

**Publication:** Circulation

**Publisher:** Wolters Kluwer Health, Inc.

**Date:** Jan 15, 2002

Copyright © 2002, Wolters Kluwer Health

Logged in as:  
Jason Tarkin  
Account #:  
3000631111

[LOGOUT](#)

## Review Order

Please review the order details and the associated [terms and conditions](#).

|                                          |                                                                                                                                                                                                    |
|------------------------------------------|----------------------------------------------------------------------------------------------------------------------------------------------------------------------------------------------------|
| Licensed Content Publisher               | Wolters Kluwer Health, Inc.                                                                                                                                                                        |
| Licensed Content Publication             | Circulation                                                                                                                                                                                        |
| Licensed Content Title                   | Identification of Fibrous Cap Rupture With Magnetic Resonance Imaging Is Highly Associated With Recent Transient Ischemic Attack or Stroke                                                         |
| Licensed Content Author                  | Chun Yuan, Shao-xiong Zhang, Nayak L. Polissar, Denise Echelard, Geraldo Ortiz, Joseph W. Davis, Elizabeth Ellington, Marina S. Ferguson, Thomas S. Hatsukami                                      |
| Licensed Content Date                    | Jan 15, 2002                                                                                                                                                                                       |
| Licensed Content Volume                  | 105                                                                                                                                                                                                |
| Licensed Content Issue                   | 2                                                                                                                                                                                                  |
| Type of Use                              | Journal/Magazine                                                                                                                                                                                   |
| Requestor type                           | Academic/Educational                                                                                                                                                                               |
| Format                                   | Print and electronic                                                                                                                                                                               |
| Portion                                  | Figures/table/illustration                                                                                                                                                                         |
| Number of figures/tables/illustrations   | 1                                                                                                                                                                                                  |
| Figures/tables/illustrations used        | Figure 2                                                                                                                                                                                           |
| Author of this Wolters Kluwer article    | No                                                                                                                                                                                                 |
| Will you be translating?                 | No                                                                                                                                                                                                 |
| Title of new article                     | Imaging Atherosclerosis                                                                                                                                                                            |
| Publication the new article is in        | Circulation Research                                                                                                                                                                               |
| Publisher of new article                 | Wolters Kluwer Health, LWW                                                                                                                                                                         |
| Author of new article                    | Jason M. Tarkin, Marc R. Dweck, Nicholas R. Evans, Richard A.P. Takx, Adam J. Brown Ahmed Tawakol, Zahi A. Fayad, James H.F. Rudd                                                                  |
| Expected publication date of new article | Jan 2016                                                                                                                                                                                           |
| Estimated size of new article (pages)    | 10                                                                                                                                                                                                 |
| Requestor Location                       | Jason M Tarkin<br>Division of Cardiovascular Medicine, University of Cambridge<br>Box 110, ACCI, Addenbrooke's Hospital<br>Hills Road<br>Cambridge, United Kingdom CB2 2QQ<br>Attn: Jason M Tarkin |
| Total                                    | 115.00 USD                                                                                                                                                                                         |

[Edit Requestor Location](#) This location may be used to determine your tax liability

I agree to these [terms and conditions](#).

I understand this license is for reuse only and that no content is provided.

|                                                  |                                      |
|--------------------------------------------------|--------------------------------------|
| Customer Code (if supplied) <input type="text"/> | <input type="button" value="APPLY"/> |
|--------------------------------------------------|--------------------------------------|
