# Supplementary material for: Imaging Atherosclerosis
Source: PubMed Central journal article supplement (PMC4756468; doi:10.1161/circresaha.115.306247), 2016-02-19
Supplement: res-118-750-s007.pdf [file res-118-750-s007.pdf]

Subject **RE: Reprint Permission Request Form Form Submission**  
From Permissions <permissions@snm.org>  
Sender Sumimoto Mark <msumimoto@snmmi.org>  
To jt545@cam.ac.uk <jt545@cam.ac.uk>  
Date 2015-12-10 23:13

Dear Jason Tarkin,

JNM has an open permission policy allowing the use of original figures and tables published in JNM in other journals. In these cases, formal permission is not required as long as proper credit is given to JNM as follows: This research was originally published in JNM. Author(s). Title. J Nucl Med. Year;vol:pp-pp. © by the Society of Nuclear Medicine and Molecular Imaging, Inc. This policy is posted online at: <http://jnm.snmjournals.org/site/misc/permission.xhtml>. (The final article with complete citation information will be published at the beginning of January 2016.)

Materials credited to outside sources are not original. In this case, the original rightsholders should be contacted for reprint permission. Copyright to material published by presenters at SNMMI Annual Meetings is retained by the original authors.

To reprint JNM material in other types of publications, please complete the online reprint permission form at: <http://www.snmmi.org/Applications/Forms/FormDisplay.aspx?FormID=23215&navItemNumber=684>.

### Mark Sumimoto

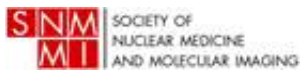

*Editorial Project Manager*

SNMMI | The Society of Nuclear Medicine and Molecular Imaging

phone: 703.652.6777 | fax: 703.708.9018

email: [msumimoto@snmmi.org](mailto:msumimoto@snmmi.org)

[www.snmmi.org](http://www.snmmi.org)

Get instant access to **100 of the most popular sessions** from SNMMI's 2015 Annual Meeting with the [SNMMI Virtual Meeting](#).

**From:** automail@cms-plus.com [mailto:automail@cms-plus.com]

**Sent:** Saturday, December 05, 2015 6:19 AM

**To:** Permissions <permissions@snm.org>

**Subject:** Reprint Permission Request Form Form Submission

The following was submitted on [www.snmmi.org](http://www.snmmi.org) as ItemNumber 74272 of form *Reprint Permission Request Form*

Requestor Information:

Full Name: Jason Tarkin  
Organization: University of Cambridge  
Address 1: Box 110, ACCI, Addenbrooke's Hospital

Address 2: Hills Road  
 City: Cambridge  
 State/Province: CAMBS  
 ZIP/Postal Code: CB2 0QQ  
 Phone: +44(0)1223331504  
 Fax: +44(0)1223331505  
 Email: [jt545@cam.ac.uk](mailto:jt545@cam.ac.uk)

#### Tell Us About Your Publication:

Authors/Editors: Jason M. Tarkin, Marc R. Dweck, Nicholas R. Evans, Adam J. Brown, Ahmed Tawakol, Zahi A. Fayad, James H.F. Rudd  
 Title of Publication: Atherosclerosis Compendium  
 Article Title (if applicable): Imaging Atherosclerosis  
 Projected Date of Publication: Early 2016  
 Publisher: Circulation Research  
 Place of Publication: Journal, online  
 Purpose of Publication (Educ., Comm., Other): Educational

#### What SNMMI Publication Material Would You Like To Reprint?

Authors: Mathieu Rubeaux, Nikhil Joshi, Marc R Dweck, Alison Fletcher, Manish Motwani, Louise E Thomson, Guido Germano, Damini Dey, Debiao Li, Daniel S. Berman, David E Newby, and Piotr J Slomka  
 Title of Publication: Motion correction of 18F-sodium fluoride PET for imaging coronary atherosclerotic plaques  
 Article Title:  
 Year: 2015  
 Volume:  
 Issue Number (if reprinting from a journal):  
 Page Numbers of Article: 1-26  
 Figure or Table Number(s): Figure 5  
 Page Numbers of Material in Question: 24  
 Additional Information:
